# Supplementary material for: Sensitive bispecific chimeric T cell receptors for cancer therapy
Source: Research Square preprint supplement (doi:10.21203/rs.3.rs-4253777/v1), 2024-04-22
Supplement: Supplementary file 1 [file 1cff6d01ca4b25d0f9730c06.xlsx]

## Sheet: sgRNA for CBE
	Gene name	Gene ID	Enzyme	sgRNA name	sequence	genetic event type	Tool for design	reference
	TRAC	ENSG00000277734.8	CBE	TRAC-1	TTCGTATCTGTAAAACCAAG	Splice acceptor	http://z.umn.edu/spliceR	Kluesner et al., Nat Comms, 2021
	TRBC	ENSG00000211751.9	CBE	TRAC-1	AGGTCCTCTGGAAAGGGAAG	Splice acceptor	http://z.umn.edu/spliceR	Kluesner et al., Nat Comms, 2021
	SLAMF7	ENSG00000026751.17	CBE	SLAMF7-1	ACTCACCTGTGAGCTGCCAA	Splice donor	http://z.umn.edu/spliceR
		ENSG00000026751.17	CBE	SLAMF7-2	GTCACCTTCACAGAGCTTCC	Splice donor	http://z.umn.edu/spliceR
		ENSG00000026751.17	CBE	SLAMF7-3	GCTGCcAAAGGATATAGATG	STOP codon	https://www.ciccialab-database.com/
		ENSG00000026751.17	CBE	SLAMF7-4	ACTCcAGCAGCCCTCCACCC	STOP codon	https://www.ciccialab-database.com/
		ENSG00000026751.17	CBE	SLAMF7-5	CTCCCcATCTCCAGGAGATG	STOP codon	https://www.ciccialab-database.com/
		Supplementary Table 1: List of sgRNAs
